# Supplementary material
Source: HighWire-hosted journal article supplement (https://bjsm.bmj.com/content/53/18/1154)
Supplement: inline-supplementary-material-1 [file inline-supplementary-material-1.pdf]

## Appendix I. Search strategies

Topic: Outcome measures for return to sport after ACL reconstruction

Search date: September 12, 2017

Database: PubMed (MEDLINE)

| Set # |                                                                                                                                                                                                                                                                                                                                                                                                                                                                                                                                                                                                                                                                                        | Results |
|-------|----------------------------------------------------------------------------------------------------------------------------------------------------------------------------------------------------------------------------------------------------------------------------------------------------------------------------------------------------------------------------------------------------------------------------------------------------------------------------------------------------------------------------------------------------------------------------------------------------------------------------------------------------------------------------------------|---------|
| 1     | "return to sport"[MeSH Terms] OR "return to play"[tiab] OR "Return to participation"[tiab] OR "return to"[tiab] OR reentry[tiab] OR "athletes"[MeSH Terms] OR "athletes"[tiab] OR "athlete"[tiab] OR "sports"[MeSH Terms] OR "sports"[tiab] OR "sport"[tiab] OR competition[tiab] OR competitions[tiab]                                                                                                                                                                                                                                                                                                                                                                                | 322256  |
| 2     | "anterior cruciate ligament reconstruction"[MeSH Terms] OR "anterior cruciate ligament reconstruction"[tiab] OR "ACL reconstruction"[tiab] OR "Anterior Cruciate Ligament Injuries/surgery"[Mesh] OR "Anterior Cruciate Ligament/surgery"[Mesh] OR ("anterior cruciate ligament"[MeSH Terms] OR "Anterior Cruciate Ligament"[tiab] OR ACL[tiab]) AND ("surgery"[Subheading] OR "surgery"[tiab] OR "surgical procedures, operative"[MeSH Terms] OR "surgical"[tiab] OR "operative"[tiab] OR "general surgery"[MeSH Terms] OR repair[tiab] OR "reconstructive surgical procedures"[MeSH Terms] OR reconstruction[tiab] OR "reconstructive"[tiab] OR augment[tiab] OR augmentation[tiab]) | 13958   |
| 3     | #1 AND #2                                                                                                                                                                                                                                                                                                                                                                                                                                                                                                                                                                                                                                                                              | 2676    |
| 4     | #3 NOT (Editorial[ptyp] OR Letter[ptyp] OR Case Reports[ptyp] OR Comment[ptyp]) NOT ("animals"[MeSH Terms] NOT "humans"[MeSH Terms])                                                                                                                                                                                                                                                                                                                                                                                                                                                                                                                                                   | 2394    |
| 5     | #4 AND English[lang]                                                                                                                                                                                                                                                                                                                                                                                                                                                                                                                                                                                                                                                                   | 2153    |

Database: CINAHL

| Set # |                                                                                                                                                                                                                                                                                                                                                                                                                                                                                   | Results |
|-------|-----------------------------------------------------------------------------------------------------------------------------------------------------------------------------------------------------------------------------------------------------------------------------------------------------------------------------------------------------------------------------------------------------------------------------------------------------------------------------------|---------|
| 1     | (MH "Sports Re-Entry") OR (MH "Sports+") OR (MH "Athletes+") OR TI ("return to sport" OR "return to play" OR "Return to participation" OR "return to" OR reentry OR "athletes" OR "athlete" OR "sports" OR "sport" OR competition OR competitions) OR AB ("return to sport" OR "return to play" OR "Return to participation" OR "return to" OR reentry OR "athletes" OR "athlete" OR "sports" OR "sport" OR competition OR competitions)                                          | 109219  |
| 2     | MH "Anterior Cruciate Ligament Reconstruction" OR "anterior cruciate ligament reconstruction" OR "ACL reconstruction" OR ((MH "Anterior Cruciate Ligament" OR MH "Anterior Cruciate Ligament Injuries" OR "anterior cruciate ligament" OR "Anterior Cruciate Ligaments" OR ACL) AND ("surgery" OR "surgical" OR "operative" OR repair OR MH "Surgery, Reconstructive+" OR "reconstructive surgical procedures" OR reconstruction OR "reconstructive" OR augment OR augmentation)) | 6815    |
| 3     | #1 AND #2                                                                                                                                                                                                                                                                                                                                                                                                                                                                         | 1604    |

|   |                                                                        |     |
|---|------------------------------------------------------------------------|-----|
| 4 | Limiters - Research Article; English Language; Exclude MEDLINE records | 133 |
|---|------------------------------------------------------------------------|-----|

Database: Embase

| Set # |                                                                                                                                                                                                                                                                                                                                                                                                          | Results |
|-------|----------------------------------------------------------------------------------------------------------------------------------------------------------------------------------------------------------------------------------------------------------------------------------------------------------------------------------------------------------------------------------------------------------|---------|
| 1     | 'return to sport'/exp OR 'return to sport':ti,ab OR 'return to play'/exp OR 'return to play':ti,ab OR 'return to participation':ti,ab OR 'return to':ti,ab OR 'reentry'/exp OR reentry:ti,ab OR 'athletes'/exp OR 'athletes':ti,ab OR 'athlete'/exp OR 'athlete':ti,ab OR 'sports'/exp OR 'sports':ti,ab OR 'sport'/exp OR 'sport':ti,ab OR 'competition'/exp OR competition:ti,ab OR competitions:ti,ab | 352379  |
| 2     | 'surgery'/exp OR 'surgery':ti,ab OR 'surgical':ti,ab OR 'operative':ti,ab OR 'general surgery'/exp OR 'repair'/exp OR repair:ti,ab OR 'reconstructive surgical procedures'/exp OR 'reconstruction'/exp OR reconstruction:ti,ab OR 'reconstructive':ti,ab OR augment:ti,ab OR augmentation:ti,ab                                                                                                          | 5379000 |
| 3     | 'anterior cruciate ligament'/exp OR 'anterior cruciate ligament':ti,ab OR 'anterior cruciate ligaments':ti,ab OR 'acl'/exp OR acl:ti,ab                                                                                                                                                                                                                                                                  | 25299   |
| 4     | #2 AND #3                                                                                                                                                                                                                                                                                                                                                                                                | 16363   |
| 5     | #4 OR 'anterior cruciate ligament reconstruction'/exp OR 'anterior cruciate ligament reconstruction':ti,ab OR 'acl reconstruction'/exp OR 'acl reconstruction':ti,ab                                                                                                                                                                                                                                     | 16963   |
| 6     | #1 AND #5                                                                                                                                                                                                                                                                                                                                                                                                | 3529    |
| 7     | #6 AND ([article]/lim OR [article in press]/lim OR [conference abstract]/lim OR [conference paper]/lim OR [review]/lim OR [short survey]/lim) AND [humans]/lim AND [english]/lim AND [embase]/lim                                                                                                                                                                                                        | 2147    |

Database: SPORTDiscus

| Set | Terms                                                                                                                                                                                                                                                                                                                                                                                                     | Results |
|-----|-----------------------------------------------------------------------------------------------------------------------------------------------------------------------------------------------------------------------------------------------------------------------------------------------------------------------------------------------------------------------------------------------------------|---------|
| 1   | (DE "ATHLETES") OR (DE "SPORTS") TI ("return to sport" OR "return to play" OR "Return to participation" OR "return to" OR reentry OR "athletes" OR "athlete" OR "sports" OR "sport" OR competition OR competitions) OR AB ("return to sport" OR "return to play" OR "Return to participation" OR "return to" OR reentry OR "athletes" OR "athlete" OR "sports" OR "sport" OR competition OR competitions) | 354733  |
| 2   | "anterior cruciate ligament reconstruction" OR "ACL reconstruction" OR ((DE "ANTERIOR cruciate ligament" OR "Anterior Cruciate Ligament" OR ACL) AND                                                                                                                                                                                                                                                      | 6443    |

|   |                                                                                                                                                                                    |     |
|---|------------------------------------------------------------------------------------------------------------------------------------------------------------------------------------|-----|
|   | ((“surgery” OR “surgical” OR “operative” OR “general surgery” OR repair OR “reconstructive surgical procedures” OR reconstruction OR “reconstructive” OR augment OR augmentation)) |     |
| 3 | #1 AND #2                                                                                                                                                                          | 671 |
| 4 | Limiters - Language: English; Publication Type: Academic Journal; Document Type: Article                                                                                           | 497 |
